# Supplementary material
Source: PubMed Central journal article supplement (PMC5014285)
Supplement: SD10.pdf [file SD10.pdf]

SUPPLEMENTAL TABLE 1  
Institutional affiliations and areas of research of global health fellows and scholars

| Country    | Institution in country                                                                                | U.S. trainees |         | LMIC trainees |         | Total no. of trainees | Area of research                                                 |
|------------|-------------------------------------------------------------------------------------------------------|---------------|---------|---------------|---------|-----------------------|------------------------------------------------------------------|
|            |                                                                                                       | Fellow        | Scholar | Fellow        | Scholar |                       |                                                                  |
| Argentina  | Instituto de Efectividad Clínica y Sanitaria                                                          | 2             | 2       | 1             |         | 5                     | Cardiovascular/pulmonary/hematologic                             |
| Bangladesh | International Center for Diarrheal Disease Research, Bangladesh                                       | 5             | 1       | 3             |         | 9                     | Maternal and child health                                        |
| Brazil     | Fundação Oswaldo Cruz                                                                                 | 2             |         | 4             |         | 14                    | Maternal and child health<br>Other infectious diseases<br>Cancer |
|            | Hospital de Câncer de Barretos                                                                        | 1             |         |               |         |                       | Cardiovascular/pulmonary/hematologic                             |
|            | Universidade do Estado do Amazonas                                                                    |               |         |               | 1       |                       | HIV/malaria/TB                                                   |
|            | Universidade Estadual de Campinas                                                                     |               |         |               | 1       |                       | Other infectious diseases                                        |
|            | Universidade Federal da Bahia                                                                         | 1             |         |               |         |                       | Women's health                                                   |
|            | Universidade Federal do Rio de Janeiro                                                                | 1             |         |               |         |                       |                                                                  |
|            | Universidade Federal do Rio Grande do Norte                                                           | 1             |         |               |         |                       |                                                                  |
|            | Universidade Federal Fluminense                                                                       | 2             |         |               |         |                       |                                                                  |
| Cameroon   | University of Yaoundé                                                                                 | 1             |         | 1             | 2       | 4                     | HIV/malaria/TB                                                   |
| Chile      | Universidad de Chile                                                                                  | 1             |         |               |         | 1                     | Other infectious diseases                                        |
| China      | Guangdong Provincial Centers for STD and Skin Diseases Control                                        |               | 1       | 2             |         | 27                    | Cancer                                                           |
|            | Guangzhou People's 8th Hospital                                                                       |               |         | 2             |         |                       | Cardiovascular/pulmonary/hematologic                             |
|            | Institute of Medical Microbiology, Fudan University                                                   |               |         | 1             |         |                       | HIV/malaria/TB                                                   |
|            | National Cancer Center, Cancer Hospital, Chinese Academy of Medical Sciences                          | 4             | 1       | 1             | 1       |                       | Mental health                                                    |
|            | National Center for AIDS, China Center for Disease Control                                            |               | 1       |               | 1       |                       | Metabolic diseases                                               |
|            | Peking Union Medical College Hospital                                                                 | 1             |         |               |         |                       | Other infectious diseases                                        |
|            | Peking University                                                                                     |               |         |               | 2       |                       | Women's health                                                   |
|            | Shanghai Cancer Institute                                                                             |               |         | 1             |         |                       |                                                                  |
|            | Sun Yat-Sen University                                                                                | 1             | 1       | 2             |         |                       |                                                                  |
|            | The George Institute for Global Health                                                                | 1             |         | 1             |         |                       |                                                                  |
|            | The National Center for AIDS/STD Control and Prevention                                               | 1             |         | 1             |         |                       |                                                                  |
| Ethiopia   | Addis Ababa University                                                                                | 2             |         |               | 1       | 5                     | Cancer                                                           |
|            | Armauer Hansen Research Institute                                                                     |               |         |               | 1       |                       | Emergency medicine/surgery<br>Health systems research            |
|            | Myunsung Christian Medical Center, Soddo Christian Hospital                                           | 1             |         |               |         |                       | HIV/malaria/TB<br>Metabolic diseases                             |
| Ghana      | Akosombo Hospital                                                                                     |               | 1       |               |         | 15                    | Cancer                                                           |
|            | Komfo Anokye Teaching Hospital                                                                        | 2             | 1       |               |         |                       | Cardiovascular/pulmonary/hematologic                             |
|            | Kwame Nkrumah University of Science and Technology                                                    | 2             | 1       | 1             |         |                       | Emergency medicine/surgery<br>HIV/malaria/TB                     |
|            | Noguchi Memorial Institute for Medical Research                                                       |               | 1       |               | 1       |                       | Maternal and child health                                        |
|            | University of Ghana                                                                                   | 3             | 1       |               |         |                       |                                                                  |
|            | University of Health and Allied Sciences                                                              |               |         |               | 1       |                       |                                                                  |
| Guatemala  | Center for Studies of Sensory Impairment, Aging and Metabolism and Universidad del Valle de Guatemala |               | 1       |               |         | 1                     | Maternal and child health                                        |
| Haiti      | Le Groupe Hatien d'Etude du Sarcome de Kaposi et des Infections Opportunistes                         | 1             | 3       | 2             |         | 6                     | HIV/malaria/TB<br>Other infectious diseases                      |
| Honduras   | Western Honduras Gastric Cancer Initiative, Universidad De Valle                                      |               | 1       |               |         | 1                     | Cancer                                                           |
| India      | All India Institute of Medical Sciences                                                               | 1             |         |               |         | 21                    | Cancer                                                           |
|            | Byramjee Jeejeebhoy Government Medical College                                                        |               | 1       |               | 1       |                       | Cardiovascular/pulmonary/hematologic                             |
|            | BLDE University                                                                                       |               |         |               | 1       |                       | Emergency medicine/surgery                                       |
|            | Center for Chronic Disease Control                                                                    | 2             |         |               |         |                       | Eye diseases                                                     |
|            | JSS Medical College                                                                                   |               |         |               | 1       |                       | HIV/malaria/TB                                                   |
|            | Madras Diabetes Research Foundation                                                                   | 2             | 2       |               |         |                       | Maternal and child health                                        |
|            | National AIDS Research Institute                                                                      | 1             |         |               |         |                       | Mental health                                                    |
|            | National Institute for Research in Tuberculosis                                                       | 1             |         |               |         |                       | Metabolic diseases                                               |
|            | Public Health Foundation of India                                                                     | 1             |         |               | 1       |                       | Neurology                                                        |
|            | Public Health Research Institute of India                                                             | 1             | 1       |               |         |                       | Noncommunicable disease                                          |
|            | Sri Ramachandra Medical University                                                                    |               |         |               | 1       |                       | Other infectious diseases                                        |
|            | St. John's Research Institute                                                                         |               |         |               | 1       |                       |                                                                  |
|            | University of Mysore                                                                                  | 2             |         |               |         |                       |                                                                  |

(continued)

SUPPLEMENTAL TABLE 1

Continued

| Country      | Institution in country                                                       | U.S. trainees                         |         | LMIC trainees |         | Total no. of trainees | Area of research                     |                            |
|--------------|------------------------------------------------------------------------------|---------------------------------------|---------|---------------|---------|-----------------------|--------------------------------------|----------------------------|
|              |                                                                              | Fellow                                | Scholar | Fellow        | Scholar |                       |                                      |                            |
| Jamaica      | University of the West Indies                                                |                                       |         |               | 1       | 1                     | Cardiovascular/pulmonary/hematologic |                            |
| Kenya        | Gertrude's Children's Hospital and Kenyatta National Hospital                | 1                                     |         |               |         | 33                    | Cardiovascular/pulmonary/hematologic |                            |
|              | Kenya Medical Research Institute                                             | 5                                     | 3       | 6             | 2       |                       | HIV/malaria/TB                       |                            |
|              | Maseno University                                                            |                                       |         |               | 1       |                       | Maternal and child health            |                            |
|              | Moi University                                                               | 3                                     |         | 2             |         |                       | Mental health                        |                            |
|              | Ololua Forest Institute of Primate Research                                  |                                       |         | 1             |         |                       | Metabolic diseases                   |                            |
|              | University of Nairobi                                                        | 4                                     | 2       | 3             |         |                       | Other infectious diseases            |                            |
| Malawi       | Kamuzu Central Hospital                                                      | 9                                     | 4       | 1             | 1       | 15                    | Women's health                       |                            |
|              |                                                                              |                                       |         |               |         |                       | Cancer                               |                            |
|              |                                                                              |                                       |         |               |         |                       | Cardiovascular/pulmonary/hematologic |                            |
|              |                                                                              |                                       |         |               |         |                       | Emergency medicine/surgery           |                            |
| Malaysia     | University of Malaya                                                         | 1                                     |         |               | 1       | 2                     | HIV/malaria/TB                       |                            |
| Mali         | Universite des Sciences, des Techniques et des Technologies de Bamako        |                                       | 1       |               |         | 1                     | HIV/malaria/TB                       |                            |
| Mexico       | El Colegio de la Frontera Norte                                              | 4                                     | 1       |               |         | 14                    | Cardiovascular/pulmonary/hematologic |                            |
|              | Universidad Autonoma de Baja California                                      | 7                                     | 2       |               |         |                       | HIV/malaria/TB                       |                            |
| Mozambique   | Universidade Eduardo Mondlane                                                | 1                                     |         | 1             |         | 2                     | Mental health                        |                            |
| Nigeria      | Bayero University and Aminu Kano Teaching Hospital                           |                                       |         |               | 1       | 1                     | Metabolic diseases                   |                            |
|              | Smithsonian Tropical Research Institute                                      | 1                                     |         |               |         | 1                     | Other infectious diseases            |                            |
| Panama       | Asociación Benéfica Proyectos de Informática, Salud, Medicina, y Agricultura | 3                                     | 2       | 1             |         | 43                    | Cardiovascular/pulmonary/hematologic |                            |
| Peru         | Asociación Civil Impacta Salud y Educación                                   | 1                                     |         | 1             |         |                       | Emergency medicine/surgery           |                            |
|              | Hospital Nacional Dos de Mayo                                                | 1                                     |         | 1             |         |                       | HIV/malaria/TB                       |                            |
|              | Instituto Nacional de Ciencias Neurologicas                                  |                                       |         | 2             |         |                       | Maternal and child health            |                            |
|              | Instituto Nacional de Salud de Nino                                          | 1                                     |         |               |         |                       | Neurology                            |                            |
|              | Tulane Health Office for Latin America                                       | 1                                     |         |               |         |                       | Other infectious diseases            |                            |
|              | U.S. Naval Medical Research Unit No.6                                        | 2                                     | 1       | 2             |         |                       | Women's health                       |                            |
|              | Universidad Nacional Mayor de San Marcos                                     | 1                                     | 3       | 3             |         |                       |                                      |                            |
|              | Universidad Peruana Cayetano Heredia                                         | 6                                     | 3       | 8             |         |                       |                                      |                            |
|              | Rwanda                                                                       | National University of Rwanda         | 1       |               | 1       |                       | 6                                    | Emergency medicine/surgery |
|              |                                                                              | University Central Hospital of Kigali | 4       |               |         |                       |                                      | HIV/malaria/TB             |
| South Africa | University of Cape Town                                                      | 4                                     | 1       |               |         |                       | Maternal and child health            |                            |
|              | University of KwaZulu-Natal                                                  | 3                                     | 1       |               |         |                       | Neurology                            |                            |
|              | University of Witwatersrang                                                  | 2                                     |         |               |         |                       | Emergency medicine/surgery           |                            |
| Sri Lanka    | Ruhuna University                                                            |                                       |         | 1             |         | 1                     | HIV/malaria/TB                       |                            |
| Tanzania     | Bugando Medical Center                                                       | 1                                     |         |               |         | 13                    | Mental health                        |                            |
|              | Catholic University of Health and Allied Sciences                            |                                       |         | 2             |         |                       | Other Infectious Diseases            |                            |
|              | Kilimanjaro Christian Medical Center                                         | 4                                     | 1       | 1             |         |                       | Cardiovascular/pulmonary/hematologic |                            |
|              | Muhimbili University of Health and Allied Sciences                           |                                       |         | 2             |         |                       | Emergency medicine/surgery           |                            |
|              | Weill Bugando Medical Center                                                 | 1                                     |         | 1             |         |                       | HIV/malaria/TB                       |                            |
| Thailand     | Armed Forces Research Institute of Medical Sciences                          | 1                                     |         |               |         | 11                    | Maternal and child health            |                            |
|              | Chulalongkorn University                                                     |                                       | 1       |               |         |                       | Metabolic diseases                   |                            |
|              | Mahidol University                                                           | 1                                     | 1       |               |         |                       | Noncommunicable disease              |                            |
|              | Prince of Songkla University                                                 | 1                                     |         | 1             |         |                       | Other infectious diseases            |                            |
|              | Thai Red Cross AIDS Research Center                                          |                                       | 1       | 2             | 2       |                       | Cancer                               |                            |

(continued)

SUPPLEMENTAL TABLE 1

Continued

| Country  | Institution in country                              | U.S. trainees |         | LMIC trainees |         | Total no. of trainees | Area of research                         |
|----------|-----------------------------------------------------|---------------|---------|---------------|---------|-----------------------|------------------------------------------|
|          |                                                     | Fellow        | Scholar | Fellow        | Scholar |                       |                                          |
| Uganda   | Infectious Diseases Institute                       | 2             | 1       | 6             |         | 34                    | Cancer                                   |
|          | Infectious Diseases Research Collaboration          | 2             |         | 1             |         |                       | Cardiovascular/pulmonary/<br>hematologic |
|          | Makerere University                                 | 8             | 2       | 8             | 1       |                       | HIV/malaria/TB                           |
|          | Mbarara Medical Center                              | 1             |         |               |         |                       | Maternal and child health                |
|          | Mbarara University of Science and Technology        |               |         | 1             |         |                       | Mental health                            |
|          | Uganda Cancer Institute                             |               | 1       |               |         |                       | Metabolic diseases                       |
|          |                                                     |               |         |               |         |                       | Neurology                                |
|          |                                                     |               |         |               |         |                       | Other infectious diseases                |
| Ukraine  | Ukrainian Institute for Public Health Policy        | 2             |         |               |         | 2                     | HIV/malaria/TB                           |
| Vietnam  | Danang Psychiatric Hospital                         |               | 1       | 2             |         | 3                     | Mental health                            |
| Zambia   | Center for Infectious<br>Disease Research in Zambia | 5             |         |               |         | 10                    | Cancer                                   |
|          |                                                     |               |         |               |         |                       | Cardiovascular/pulmonary/<br>hematologic |
|          | University of Zambia                                | 2             |         | 2             |         |                       | HIV/malaria/TB                           |
|          | Zambia-Emory HIV Research Project                   | 1             |         |               |         |                       | Maternal and child health                |
|          |                                                     |               |         |               |         |                       | Other infectious diseases                |
| Zimbabwe | University of Zimbabwe                              |               |         | 3             |         | 3                     | HIV/malaria/TB                           |
|          |                                                     |               |         |               |         |                       | Mental health                            |
|          |                                                     | 145           | 56      | 96            | 19      | 316                   |                                          |

AIDS = acquired immunodeficiency syndrome; HIV = human immunodeficiency virus; LMIC = low- and middle- income countries; STD = sexually transmitted disease; TB = tuberculosis.
